# Supplementary material for: A New Approach in the Induction of Labor with Misoprostol Vaginal Insert in High-Risk Pregnancy Obese Women
Source: Preprints.org preprint supplement (doi:10.20944/preprints202011.0653.v1), 2020-11-25
Supplement: Supplementary file 3 [file supplementary:Figure%203.pdf]

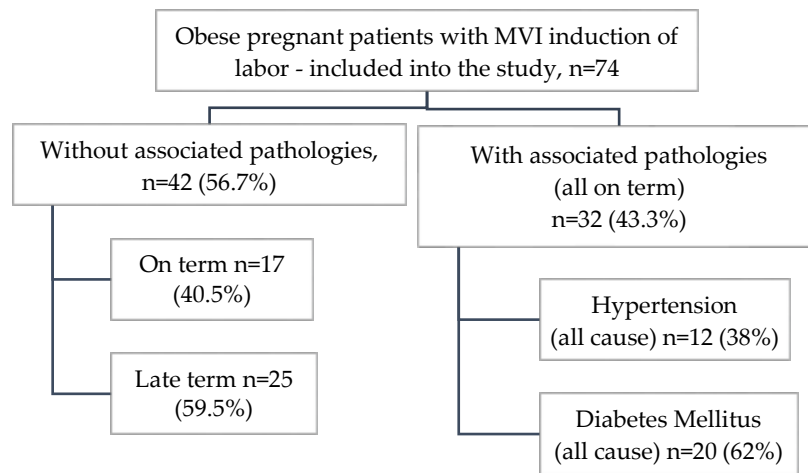

**Figure 3.** Distribution of the subjects in the study based on high-risk criteria in obese pregnant patients with MVI IOL.
