# Supplementary material for: A New Approach in the Induction of Labor with Misoprostol Vaginal Insert in High-Risk Pregnancy Obese Women
Source: Preprints.org preprint supplement (doi:10.20944/preprints202011.0653.v1), 2020-11-25
Supplement: Supplementary file 5 [file supplementary:Figure%205.pdf]

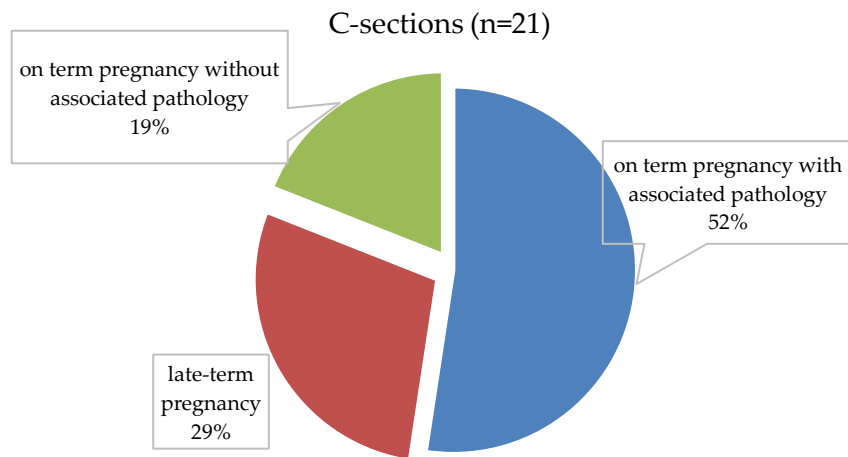

**Figure 5.** The distribution of C-sections in the study group. No late term pregnancy with associated pathology and C section was identified
