# Supplementary material for: A New Approach in the Induction of Labor with Misoprostol Vaginal Insert in High-Risk Pregnancy Obese Women
Source: Preprints.org preprint supplement (doi:10.20944/preprints202011.0653.v1), 2020-11-25
Supplement: Supplementary file 6 [file supplementary:Table%201.pdf]

**Table 1.** Description of study participant group structure and characteristics.

| Parameter                                           | Study group |    |
|-----------------------------------------------------|-------------|----|
|                                                     | %           | n  |
| Sample size                                         | 100%        | 74 |
| <b>Parity</b>                                       |             |    |
| no prior pregnancy <i>vs</i> *                      | 91.9%       | 68 |
| more than one and less than three prior pregnancies | 8.1%        | 6  |
| <b>Maternal age</b>                                 |             |    |
| under 35 years                                      | 90.5%       | 67 |
| 35 years and above                                  | 9.4%        | 7  |
| <b>Gestational age at delivery (weeks)</b>          |             |    |
| < 41weeks (on-term pregnancy)                       | 66.3%       | 49 |
| 41 – 41+6 weeks (late-term pregnancy)               | 33.7%       | 25 |
| <b>Associated pathology</b>                         |             |    |
| women <i>without</i> associated pathology           | 56.7%       | 42 |
| women <i>with</i> associated pathologies            | 43.3%       | 32 |
| <b>Bishop score</b>                                 |             |    |
| 0 - 2                                               | 67.5%       | 50 |
| 3 - 4                                               | 32.5%       | 24 |
| <b>Supplementary pharmacotherapy</b>                |             |    |
| Epidural anesthesia                                 | 55.4%       | 41 |
| Oxytocin                                            | 75.6%       | 56 |

\**vs.* – versus
