# Supplementary material for: A New Approach in the Induction of Labor with Misoprostol Vaginal Insert in High-Risk Pregnancy Obese Women
Source: Preprints.org preprint supplement (doi:10.20944/preprints202011.0653.v1), 2020-11-25
Supplement: Supplementary file 7 [file supplementary:Table%202.pdf]

**Table 2.** Outcomes of the MVI IOL in the studied group by type of risk factor.

| <b>Parameter</b>                       | <b>No risk obese<br/>MVI IOL</b>     |                                       | <b>High risk obese<br/>MVI IOL</b> |                                      |
|----------------------------------------|--------------------------------------|---------------------------------------|------------------------------------|--------------------------------------|
|                                        | On-term pregnancies<br>(n=17) X± SD* | Late-term pregnancies<br>(n=25) X± SD | Preeclampsia<br>(n=12)<br>X± SD    | Diabetes Mellitus<br>(n=20)<br>X± SD |
| Gestational age (weeks)                | 39.9 ± 0.9                           | 41.3 ± 0.2                            | 38.9 ± 0.6                         | 38.9 ± 0.6                           |
| Misoprostol action (h)                 | 12.34 ± 5.7                          | 11.0 ± 5.9                            | 12.3 ± 6.6                         | 10.8 ± 3.9                           |
| Time from induction to delivery<br>(h) | 18.75 ± 8.47                         | 16.78 ± 5.57                          | 17.37 ± 7.42                       | 16.62 ± 4.69                         |
| Initial Bishop score                   | 2.2 ± 0.8                            | 1.28 ± 1.5                            | 2.7 ± 1.1                          | 1.7 ± 1.2                            |
| One-min* Apgar score                   | 8.5 ± 0.8                            | 8.56 ± 0.7                            | 8.41 ± 0.8                         | 8.4 ± 1.2                            |
| Five-min* Apgar score                  | 9.2 ± 0.7                            | 9.08 ± 0.6                            | 9 ± 0.6                            | 9 ± 0.6                              |
| Fetal weight (grams)                   | 3205.2 ± 434.4                       | 3450 ± 301.4                          | 3417.5 ± 478.8                     | 3417.5 ± 478.8                       |

\*X± SD - Data are expressed as mean ± standard deviation or n (%) unless otherwise specified, \* min –minute
