# Supplementary material for: A New Approach in the Induction of Labor with Misoprostol Vaginal Insert in High-Risk Pregnancy Obese Women
Source: Preprints.org preprint supplement (doi:10.20944/preprints202011.0653.v1), 2020-11-25
Supplement: Supplementary file 8 [file supplementary:Table%203.pdf]

**Table 3.** Outcomes of the MVI IOL in the studied group by type of birth.

| Parameter                              | Vaginal births (n=53)<br>X± SD* |                                  | Cesareans (n=21)<br>X± SD |
|----------------------------------------|---------------------------------|----------------------------------|---------------------------|
|                                        | Spontaneous<br>(n=42)           | Instrumental<br>maneuvers (n=11) |                           |
| Gestational age (weeks)                | 40.2 ± 1.2                      | 39.4 ± 1.4                       | 39.7 ± 1.3                |
| Misoprostol action (h)                 | 11.9 ± 6.1                      | 11.1 ± 4.9                       | 10.91 ± 4.4               |
| Time from induction to<br>delivery (h) | 17.85 ± 7.14                    | 16.2 ± 5.9                       | 16.87 ± 4.7               |
| Bishop's score                         | 1.7 ± 1.3                       | 1.7 ± 0.9                        | 2.1 ± 1.4                 |
| One-min Apgar score                    | 8.6 ± 0.7                       | 8.7 ± 1.0                        | 8.1 ± 1.1                 |
| Five-min Apgar score                   | 9.1 ± 0.6                       | 9.2 ± 0.7                        | 8.9 ± 0.7                 |
| Fetal weight (grams)                   | 3439.2 ± 399.6                  | 3204.5 ± 507.2                   | 3257.1 ± 99.3             |

\*X± SD - Data are expressed as mean ± standard deviation or n (%) unless otherwise specified, \* min –minute
