# Supplementary figures and images for: A New Approach in the Induction of Labor with Misoprostol Vaginal Insert in High-Risk Pregnancy Obese Women
Source: Preprints.org preprint supplement (doi:10.20944/preprints202011.0653.v1), 2020-11-25

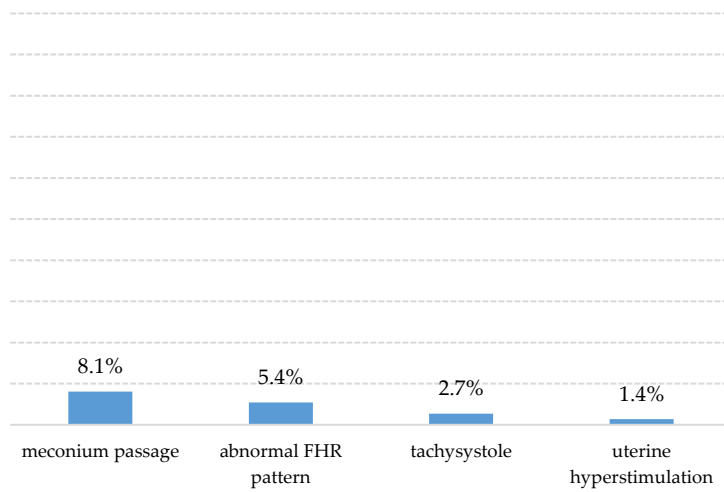

**Figure 10.** Side effects registered in the study group (n=13, 17.6 %)

Supplement: Supplementary file 1 [file supplementary:Figure%2010.pdf]

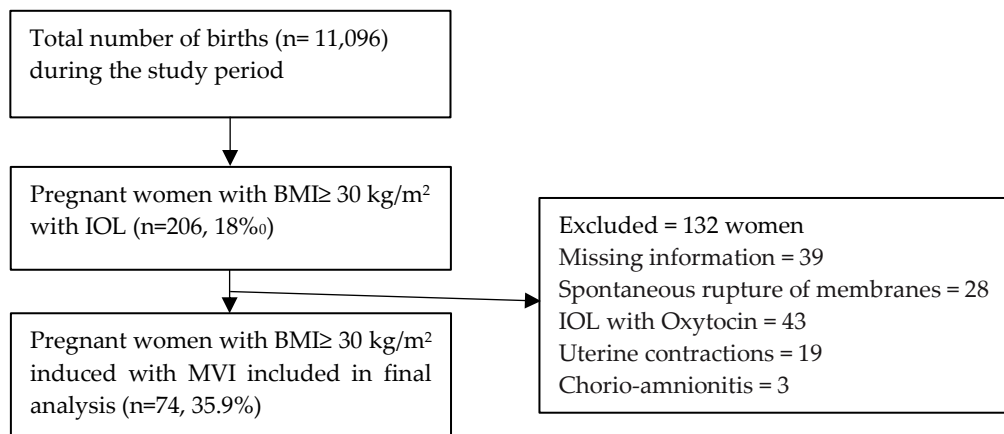

**Figure 2.** Flow-diagram of patient selection and distribution.

Supplement: Supplementary file 2 [file supplementary:Figure%202.pdf]

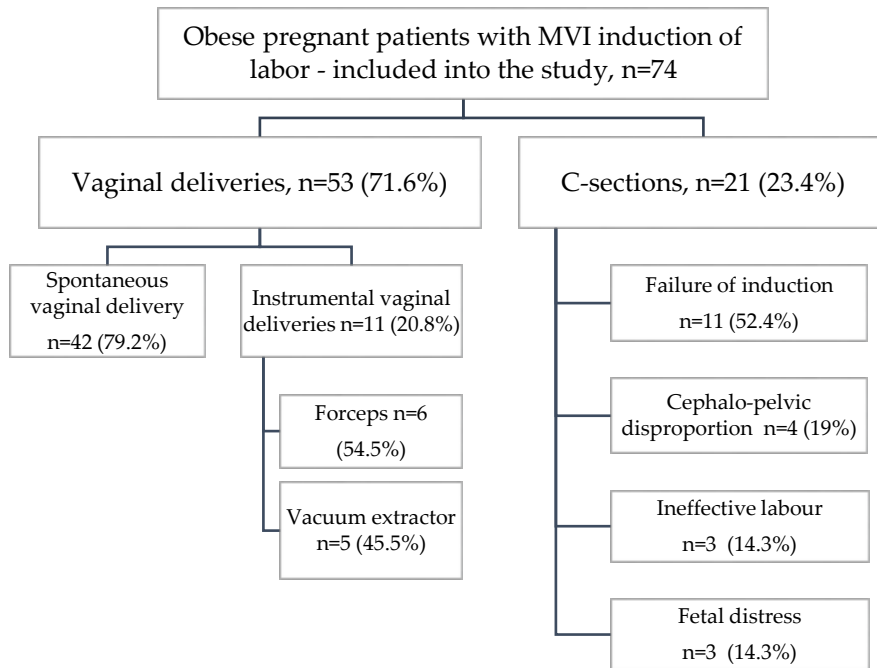

**Figure 4.** The distribution of delivery types in the study group.

Supplement: Supplementary file 4 [file supplementary:Figure%204.pdf]
